# Supplementary material for: Visualization and assessment of the microbial colonization process of disposable surgical masks in a typical natural aquatic environment
Source: Royal Society of Chemistry journal article supplement (doi:10.1039/d2ew00154c), 2022-01-01
Supplement: d2ew00154c1.pdf [file d2ew00154c1.pdf]

## Supporting Information

### **Visualization and assessment of the microbial colonization process of disposable surgical mask in typical natural aquatic environment**

Li Liu<sup>1,2\*</sup>, Peiqin Tang<sup>1</sup>, Ruitong Li<sup>1</sup>

<sup>1</sup> *School of Chemistry, Beihang University, 100191 Beijing, P. R. China*

<sup>2</sup> *CAS Key Laboratory of Urban Pollutant Conversion, University of Science and Technology of China*

#### **\*Corresponding authors:**

Dr. Li Liu  
School of Chemistry  
Beihang University  
P. R. China  
E-mail: [lililiu@buaa.edu.cn](mailto:lililiu@buaa.edu.cn)

This Supporting Information contains 9-pages of text, one tables and six figures, including this cover page.

## 1. Image analysis

The fluorescence images of the biofilm-colonized disposable surgical mask pieces stained by LIVE/DEAD® BacLight™ bacterial viability kits were analyzed by using the open-source software Fiji (version 1.53c, Wayne Rasband, National Institutes of Health, USA).<sup>1</sup> The image analysis procedures are as follows (Figure S4):

(1) Input the fluorescence images; (2) Change the image type of all analyzed images to 8-bit gray scale and subtract the background by setting rolling ball radius to 50 pixels; (3) Segmentation, choose 'default' option and adjust threshold value to get the appropriate image; (4) Use binary and watershed to make the segment more accurate; (5) Analyze particles, remove the particles that are too small by setting the smallest size of 0.3  $\mu\text{m}^2$ ; (6) Output.<sup>2-4</sup>

## 2. Cell abundance calculation

The cell abundance of the biofilm colonized disposable surgical mask was quantified by A%, which was defined as the percentage of microorganisms colonized area to the whole image area; the microorganisms colonized area of each fluorescent image was calculated following the image analysis procedures in Figure S4. Then, A% was defined as:

$$A\% = A_{\text{Microorganisms colonized area}} / A_{\text{Fluorescent image area}}$$

## Additional Literature Cited

- (1) Schindelin, J.; Arganda-Carreras, I.; Frise, E.; Kaynig, V.; Longair, M.; Pietzsch, T.; Preibisch, S.; Rueden, C.; Saalfeld, S.; Schmid, B.; Tinevez, J. Y.; White, D. J.; Hartenstein, V.; Eliceiri, K.; Tomancak, P.; Cardona, A., Fiji: an open-source platform for biological-image analysis. *Nat. Methods* **2012**, *9*, (7), 676-682.
- (2) Shihan, M. H.; Novo, S. G.; Le Marchand, S. J.; Wang, Y.; Duncan, M. K., A simple method for quantitating confocal fluorescent images. *Biochem. Biophys. Rep.* **2021**, *25*, No. 100916.
- (3) Zhou, Z.; Tan, Y.; Xiao, Y.; Stuckey, D. C., Characterization and significance of sub-visible particles and colloids in a submerged anaerobic membrane bioreactor (SAnMBR). *Environ. Sci. Technol.* **2016**, *50*, (23), 12750-12758.
- (4) Bera, T.; Xu, J.; Alusta, P.; Fong, A.; Linder, S. W.; Torosian, S. D., Estimating bacterial concentrations in fibrous substrates through a combination of scanning electron microscopy and ImageJ. *Anal Chem* **2019**, *91*, (7), 4405-4412.

**Table S1 Identification of main absorbance peaks in FTIR spectra of disposable surgical mask exposed in Nanhu Lake at Site 1.**

| Wavelength (cm <sup>-1</sup> ) | Description                                                                    |
|--------------------------------|--------------------------------------------------------------------------------|
| 3400-3200                      | O-H and N-H stretching vibration                                               |
| 2948                           | Asymmetric stretching vibration of CH <sub>3</sub>                             |
| 2915                           | Asymmetric stretching vibration of CH <sub>2</sub>                             |
| 2868                           | Symmetric stretching vibration of CH <sub>3</sub>                              |
| 2837                           | Symmetric stretching vibration of CH <sub>2</sub>                              |
| 1648                           | Amide I : C=O stretching, N-H bending and C-N bending                          |
| 1553-1535                      | Amide II : C-N and N-H bending, C-N stretching                                 |
| 1452                           | Asymmetric bending of CH <sub>3</sub> and bending vibration of CH <sub>2</sub> |
| 1374                           | Symmetric bending of CH <sub>3</sub>                                           |
| 1245-1210                      | C-N stretching and N-H bending; C-O stretching; P=O stretching in phosphates   |
| 1100-1048                      | C-N stretching; C-O-C, C-OH vibrations in polysaccharides                      |

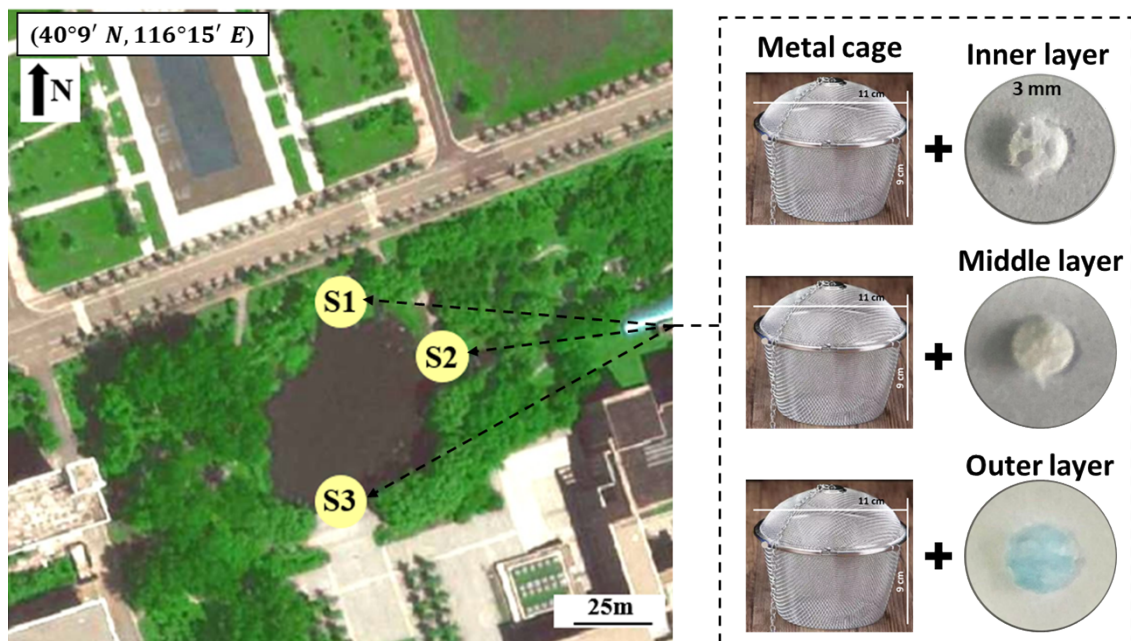

**Fig. S1** The spatial location of DSM exposure sites and the experimental setup in this study.

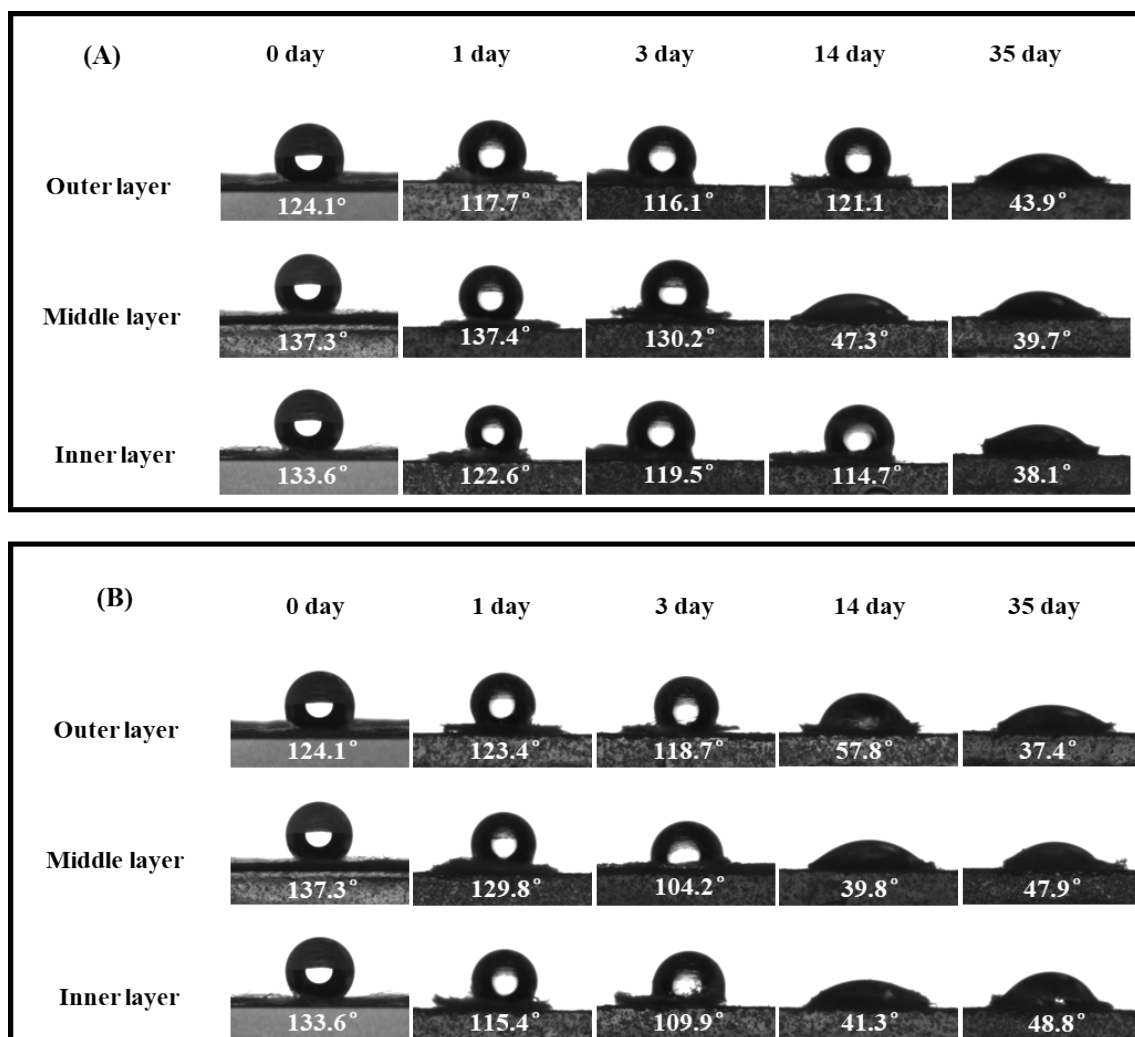

**Fig. S2** Contact angle of the biofilm colonization process on disposable surgical mask after 1, 3, 14, 35 days of exposure in Nanhu Lake at (A) Site 2 and (B) Site 3.

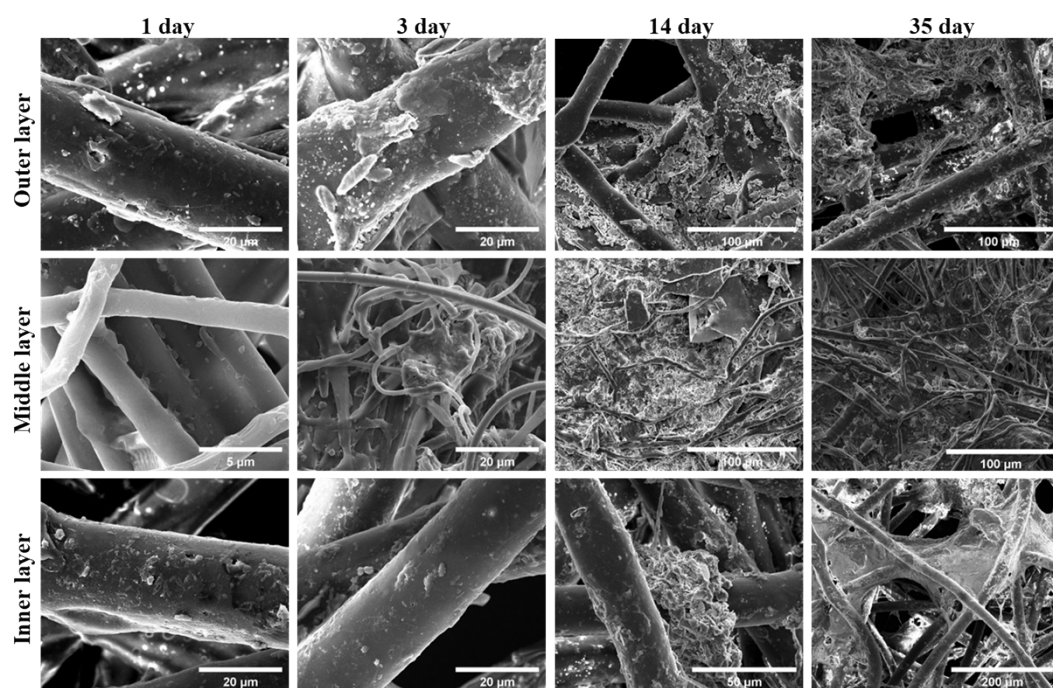

**Fig. S3** The magnified SEM images of different layers of the disposable surgical mask.

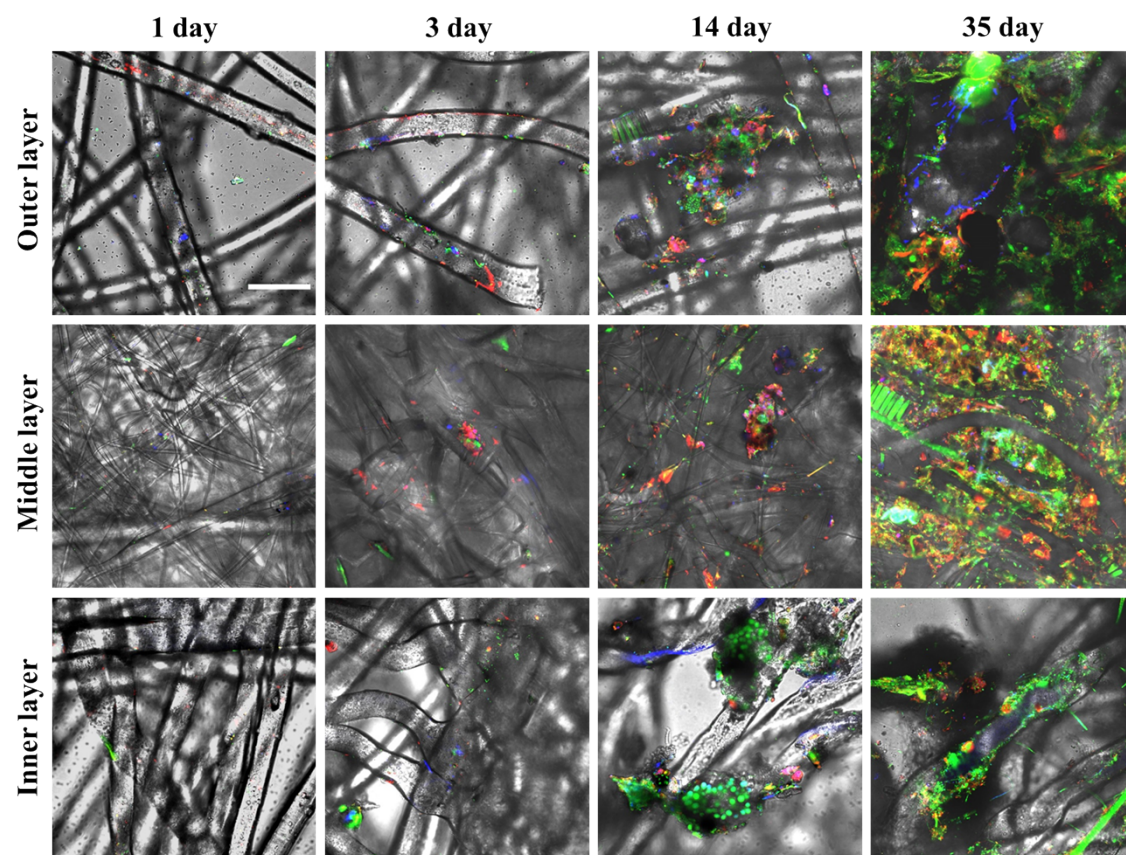

**Fig. S4** CLSM images of the biofilms colonized DSM after 1, 3, 14 and 35 days of exposure in Nanhu Lake at Site 1. Color allocation: blue (cells), green (protein), red ( $\alpha$ -D-glucopyranose polysaccharides), and transmission image of black and white. (scale bar 50  $\mu$ m)

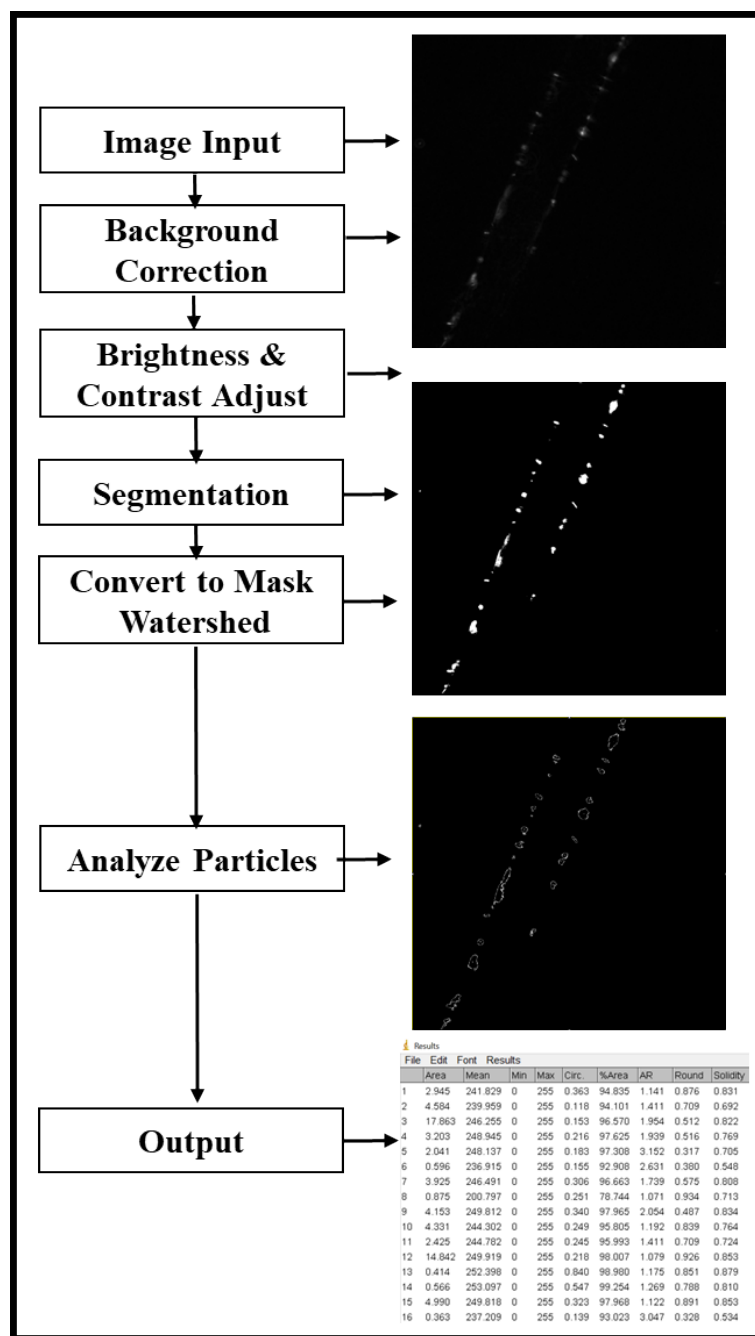

Fig. S5 Schematic representation of the fluorescence image analysis procedure.



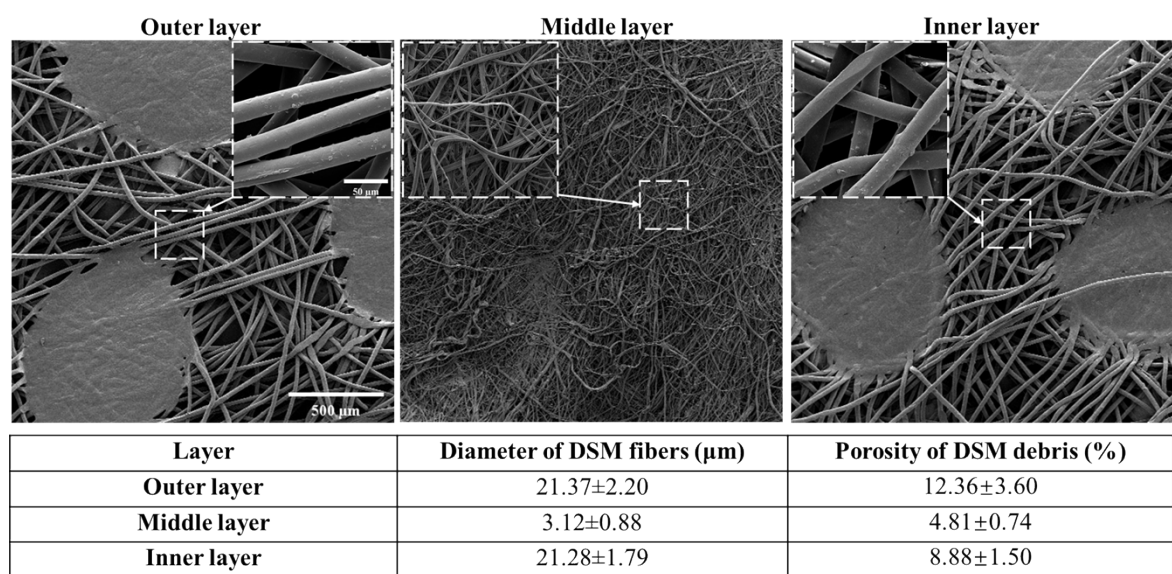

**Fig. S6** Surface characteristics of different layers of the disposable surgical mask.
